# Supplementary material
Source: PubMed Central journal article supplement (PMC6931164)

Supplemental Figure 1. Bar graphs of Western blots

(Fig. 1b)

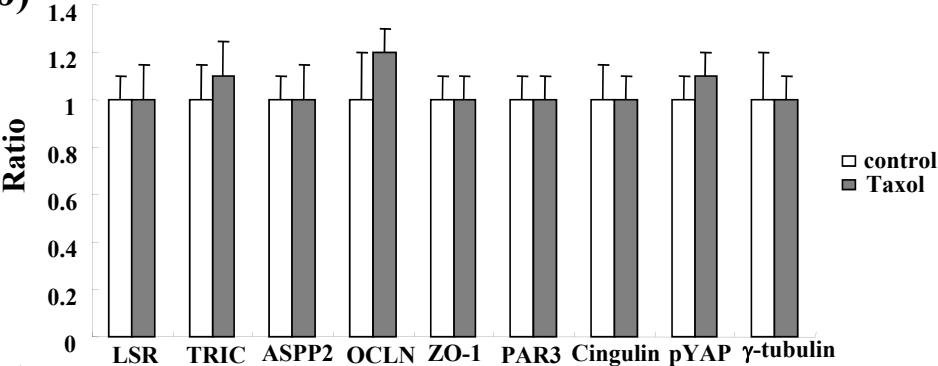

(Fig. 5c)

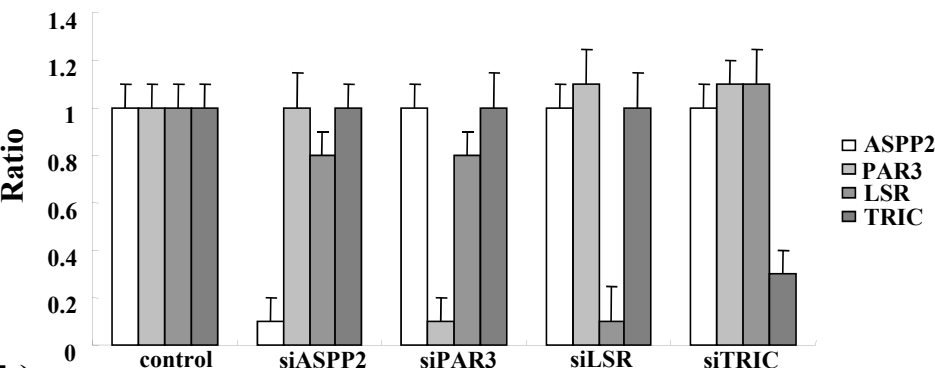

(Fig. 6b)

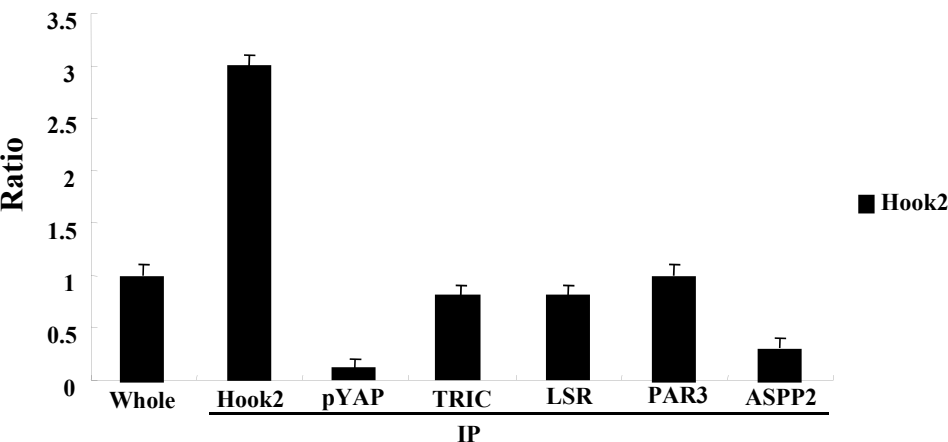

(Fig. 7b)

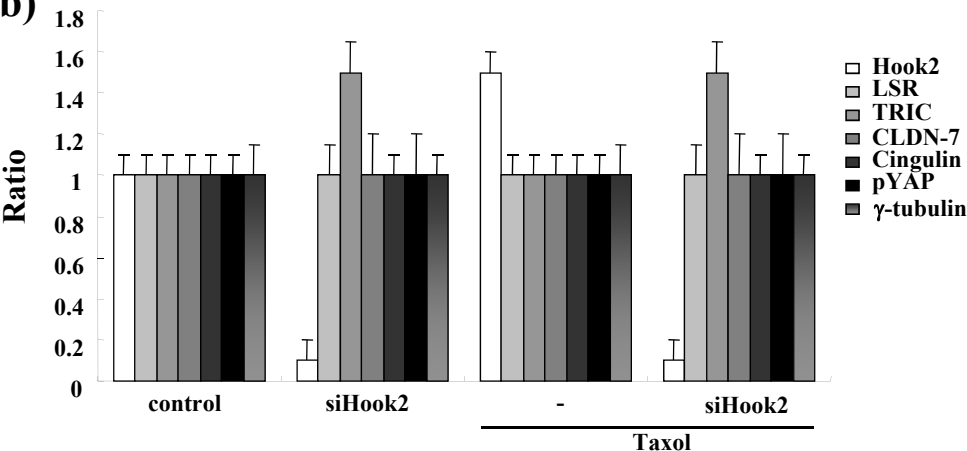

**Supplemental Figure 2.** Immunocytochemical staining for LSR (green), TRIC (green) and pYAP (green) with acetylated-tubulin (red) in hTERT-human nasal epithelial cells. Bars: 10  $\mu$ m.

**LSR&Ac-tub**

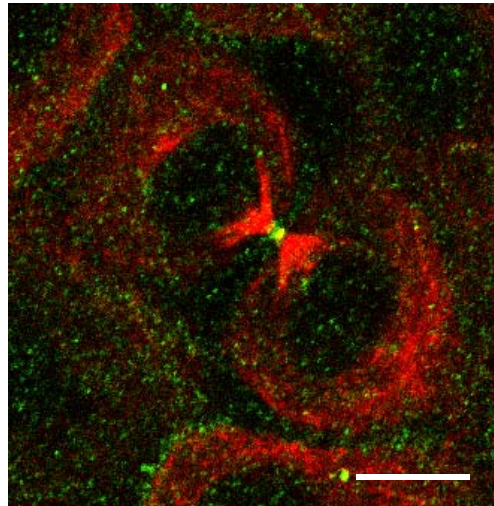

**TRIC&Ac-tub**

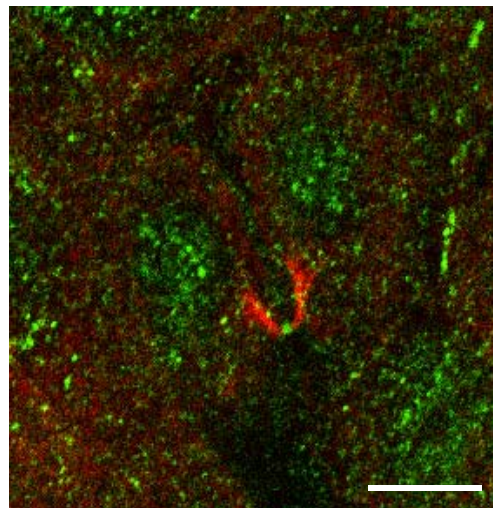

**pYAP&Ac-tub**

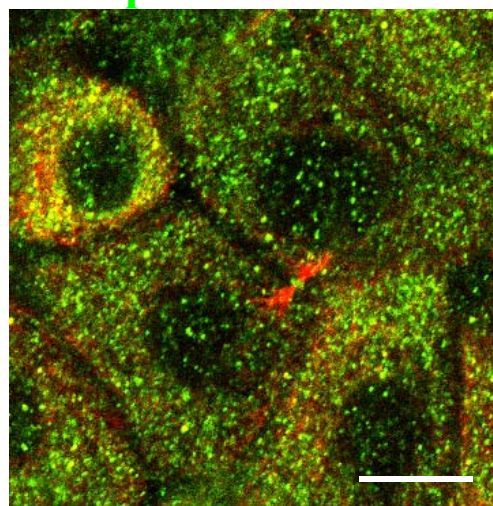

Supplement: 2019-00123R1_Production_Supplemental_Figures_online_supp.pdf [file 2019-00123R1_Production_Supplemental_Figures_online_supp.pdf]
